# Supplementary material
Source: PubMed Central journal article supplement (PMC5901382)
Supplement: fj.201700909R.st1.pdf [file fj.201700909R.st1.pdf]

| Gene Name | HSP90 evidence                                    | Related to cilium | Additional experimental confirmations |               |               |
|-----------|---------------------------------------------------|-------------------|---------------------------------------|---------------|---------------|
|           | number of DB or experiments reporting interaction | SCGS Status       | PMID:26638075                         | PMID:27033521 | PMID:26167768 |
| CTNNB1    | 3                                                 | +                 | 1                                     | 0             | 0             |
| HSPA8     | 3                                                 | +                 | 1                                     | 0             | 0             |
| PAFAH1B1  | 3                                                 | +                 | 1                                     | 0             | 0             |
| HTT       | 3                                                 | +                 | 0                                     | 0             | 0             |
| TRAF3IP1  | 2                                                 | +                 | 1                                     | 1             | 0             |
| CEP97     | 2                                                 | +                 | 1                                     | 0             | 0             |
| DNAAF2    | 2                                                 | +                 | 1                                     | 0             | 0             |
| IQCB1     | 2                                                 | +                 | 1                                     | 0             | 0             |
| NEK8      | 2                                                 | +                 | 1                                     | 0             | 0             |
| TUBA1A    | 2                                                 | +                 | 1                                     | 0             | 0             |
| GSK3B     | 2                                                 | +                 | 0                                     | 0             | 0             |
| MKKS      | 2                                                 | +                 | 0                                     | 0             | 0             |
| STK36     | 2                                                 | +                 | 0                                     | 0             | 0             |
| STK38L    | 2                                                 | +                 | 0                                     | 0             | 0             |
| TRIM32    | 2                                                 | +                 | 0                                     | 0             | 0             |
| VHL       | 2                                                 | +                 | 0                                     | 0             | 0             |
| PLK1      | 1                                                 | +                 | 1                                     | 1             | 0             |
| TNPO1     | 1                                                 | +                 | 1                                     | 1             | 0             |
| TTC12     | 1                                                 | +                 | 1                                     | 1             | 0             |
| AHI1      | 1                                                 | +                 | 1                                     | 0             | 0             |
| INVS      | 1                                                 | +                 | 1                                     | 0             | 0             |
| MAPRE1    | 1                                                 | +                 | 1                                     | 0             | 0             |
| MKS1      | 1                                                 | +                 | 1                                     | 0             | 0             |
| NEK4      | 1                                                 | +                 | 1                                     | 0             | 0             |
| NPHP1     | 1                                                 | +                 | 1                                     | 0             | 0             |
| NPHP4     | 1                                                 | +                 | 1                                     | 0             | 0             |
| TTK       | 1                                                 | +                 | 1                                     | 0             | 0             |
| TUBA1C    | 1                                                 | +                 | 1                                     | 0             | 0             |
| TUBB2B    | 1                                                 | +                 | 1                                     | 0             | 0             |
| TUBGCP2   | 1                                                 | +                 | 1                                     | 0             | 0             |
| TUBGCP3   | 1                                                 | +                 | 1                                     | 0             | 0             |
| BBS4      | 1                                                 | +                 | 0                                     | 0             | 0             |
| CEP250    | 1                                                 | +                 | 0                                     | 0             | 0             |

|          |   |     |   |   |   |
|----------|---|-----|---|---|---|
| DNAH1    | 1 | +   | 0 | 0 | 0 |
| DYX1C1   | 1 | +   | 0 | 0 | 0 |
| EXOC5    | 1 | +   | 0 | 0 | 0 |
| FLNA     | 1 | +   | 0 | 0 | 0 |
| MAK      | 1 | +   | 0 | 0 | 0 |
| NUP62    | 1 | +   | 0 | 0 | 0 |
| PACRG    | 1 | +   | 0 | 0 | 0 |
| PTCH1    | 1 | +   | 0 | 0 | 0 |
| TRAPPC3  | 1 | +   | 0 | 0 | 0 |
| TUBA4A   | 1 | +   | 0 | 0 | 0 |
| TUBB3    | 1 | +   | 0 | 0 | 0 |
| TUBE1    | 1 | +   | 0 | 0 | 0 |
| VDAC3    | 1 | +   | 0 | 0 | 0 |
| HSP90AA1 | 4 | +/- | 1 | 0 | 0 |
| HSP90B1  | 4 | +/- | 1 | 0 | 0 |
| PTGES3   | 4 | +/- | 1 | 0 | 0 |
| STIP1    | 4 | +/- | 1 | 0 | 0 |
| CRNKL1   | 3 | +/- | 0 | 2 | 0 |
| BIRC5    | 3 | +/- | 0 | 1 | 0 |
| HSPA5    | 3 | +/- | 1 | 0 | 0 |
| UBC      | 3 | +/- | 0 | 1 | 0 |
| PSMD2    | 2 | +/- | 1 | 0 | 1 |
| CCT2     | 2 | +/- | 1 | 0 | 0 |
| CUL1     | 2 | +/- | 1 | 0 | 0 |
| DYNC1H1  | 2 | +/- | 1 | 0 | 0 |
| LMAN1    | 2 | +/- | 1 | 0 | 0 |
| NUDC     | 2 | +/- | 1 | 0 | 0 |
| P4HB     | 2 | +/- | 1 | 0 | 0 |
| PSMD1    | 2 | +/- | 1 | 0 | 0 |
| RUVBL1   | 2 | +/- | 1 | 0 | 0 |
| YWHAE    | 2 | +/- | 1 | 0 | 0 |
| GRB2     | 4 | -   | 1 | 1 | 0 |
| LATS2    | 3 | -   | 1 | 1 | 0 |
| CRNKL1   | 3 | -   | 0 | 2 | 0 |
| PSMC4    | 2 | -   | 1 | 0 | 1 |
| PSMD2    | 2 | -   | 1 | 0 | 1 |
| TRAF3IP1 | 2 | -   | 1 | 1 | 0 |

|        |   |   |   |   |   |
|--------|---|---|---|---|---|
| PRPF8  | 2 | - | 0 | 1 | 1 |
| PSMD8  | 1 | - | 0 | 2 | 1 |
| NXF1   | 1 | - | 1 | 1 | 0 |
| PDLIM7 | 1 | - | 1 | 1 | 0 |
| PLK1   | 1 | - | 1 | 1 | 0 |
| TNPO1  | 1 | - | 1 | 1 | 0 |
| TTC12  | 1 | - | 1 | 1 | 0 |
| PSMA3  | 1 | - | 0 | 1 | 1 |
|        |   |   |   |   |   |

All proteins reported in this table are listed as HSP90 interactors in at least one of the following: HSP90Int.DB; Ingenuity Pathway Analysis; String; GeneMania, retrieved as of Jan.1, 2017

**Supp Table 1.** List of genes physically linked to ciliary proteome, and to HSP90. Genes (column **A**) were identified by mining three databases reporting interactors with HSP90, including HSP90Int.DB; Ingenuity Pathway Analysis; String; GeneMania: using data updated January 1, 2017. Column B represents the number of independent databases reporting the interaction. Columns C-F represent detection of the indicated gene as relevant to ciliary dynamics, as reported in the SYSCILIA gold standard SCGS (column **C**, PMID 23725226) or the indicated references in Pubmed, PMIDs 26638075 (62)(**D**), 27033521 (19) (**E**), or 26167768 (18)(**F**).
